# **FDA approved Artificial Intelligence and Machine Learning (AI/ML)-Enabled Medical Devices: An updated 2022 landscape**

Geeta Joshi<sup>1</sup>, Aditi Jain<sup>2</sup>, Sabina Adhikari<sup>3</sup>, Harshit Garg<sup>4</sup>, Mukund Bhandari<sup>5</sup>

## **Abstract**

As artificial intelligence (AI) has been highly advancing in the last decade, machine learning (ML) based medical devices are increasingly used in healthcare. In this article, we did an extensive search on FDA database and performed analysis of FDA approved Artificial Intelligence and Machine Learning (AI/ML)-Enabled Medical Devices. We have presented all the listed AI/ML-Enabled Medical Devices according to the date of approval, medical specialty, implementation modality of Medical Devices, and anatomical site of use. Our summary includes the current landscape of FDA approved AI/ML-Enabled Medical Devices till date and different FDA approval pathways for medical devices which will help understand the overview of AI/ML-Enabled Medical Devices, and its overall trends.

**Keywords:** Machine Learning, Artificial Intelligence, FDA, Medical Devices

Corresponding author:

Mukund Bhandari, B.S., M.S.

bhandarim@livemail.uthscsa.edu

Greehey Children Cancer Research Center, San Antonio, TX

<https://orcid.org/0000-0001-9648-4844>

<sup>1</sup> VCSG Medical College, India

<sup>2</sup>Department of Obstetrics and Gynecology, UTHealth San Antonio, TX,

<sup>3</sup>Department of Computer Science, Texas A&M University, College Station, TX,

<sup>4</sup>Department of Urology, UTHealth San Antonio, TX

<sup>5</sup>Greehey Children Cancer Research Center, San Antonio, TX

## **Competing Interest Statement**

The authors have declared no competing interest.

## **Introduction**

The term Artificial intelligence (AI) was coined by John McCarthy in 1956 during a conference for summer research project<sup>1</sup> and is broadly defined as the ability of computer program to perform broad tasks that usually needs human intelligence such as reasoning and learning. As application of AI is being widely adopted it has branched into other subsets as shown in Figure 1, but terminologies such as artificial intelligence machine learning and deep learning are often used interchangeably. Machine learning is a subset of AI that learns from the data it was provided over time to make prediction when the test dataset is supplied. The subset of AI, Deep learning (DL) implements complex algorithm called neural networks that are modelled like neurons in human brain<sup>2</sup> and widely used in speech recognition, computer vision, drug discovery and genomics<sup>3</sup>. The robustness of these model gets better as the models are trained with more comprehensive, inclusive and heterogenous data<sup>4</sup>.

Machine learning, a subset of AI has been widely used in medical research to identify valuable clinical insights from the vast amount of data generated of health care every day<sup>5</sup>. Implementation of ML model has increased in medical devices<sup>6</sup>. In United States, devices that are labelled as medical devices must get its approval from Food and Drug Administration (FDA). FDA regulates and approves medical devices via one of the 3 regulatory pathways, 510(k) clearance<sup>7</sup>, De Novo review<sup>8</sup>, or premarket approval (PMA)<sup>9</sup> as shown in Table 1.

In this article, we present the most updated and current landscape of AI/ML-enabled medical devices approved by FDA in United States. This is the first article to analyze the status of AI/ML-enabled medical devices after FDA has updated the list on October 5, 2022 with 178 new medical devices marketed in the United States<sup>6</sup>.

**Table 1: FDA approval pathways and sub-pathways for AI/ML-based devices**

| <b>FDA regulatory pathway</b> | <b>Description</b>                                                                                                                                                                                                                                                                                                                                                                                                                                                                                                                                                                                        |
|-------------------------------|-----------------------------------------------------------------------------------------------------------------------------------------------------------------------------------------------------------------------------------------------------------------------------------------------------------------------------------------------------------------------------------------------------------------------------------------------------------------------------------------------------------------------------------------------------------------------------------------------------------|
| 510(k) pathway                | <p><b>Traditional 510(k):</b> depends on demonstration of Substantial Equivalence</p> <p><b>Abbreviated 510(k):</b> depends on the use of guide documents, controls and recognized standards</p> <p><b>Special 510(k):</b> when device modifications is made to a manufacturer's own legally marketed device</p>                                                                                                                                                                                                                                                                                          |
| De Novo                       | <p><b>Option 1:</b> After obtaining a high-level not substantially equivalent (NSE) determination</p> <p><b>Option 2:</b> After determining that there is no legally marketed device</p>                                                                                                                                                                                                                                                                                                                                                                                                                  |
| Premarket approval (PMA)      | <p><b>Traditional PMA:</b> include application with device description and intended use, nonclinical/clinical studies, case report forms, manufacturing methods, labeling</p> <p><b>Modular PMA:</b> for medical products in early stages of clinical study</p> <p><b>Product Development Protocol:</b> for devices that uses well established technology and serves as a contract upon details of design and development activities</p> <p><b>Humanitarian Use Device (HUD):</b> for device intended to benefit not more than 8,000 patients in the treatment or diagnosis of a disease or condition</p> |

## Methods

We collected the list of AI/ML-enabled devices across medical disciplines provided by FDA which was assembled by searching FDA’s publicly facing information as well as information provided by the specific manufacturers in their public notifications.

The inclusion criteria of AI/ML-based medical devices in our research includes the medical devices that are listed in FDA webpage in its most recent update in Oct 5, 2022 which should not be considered exhaustive and comprehensive in its entirety. Other AI/ML-based medical devices not yet approved by FDA or medical devices that are not categorized as AI/ML-based medical devices are not included.

Once the inclusion criteria were defined, we used unique submission number of each medical devices and manually extracted all the important features of the devices including date of approval, approval pathway, parent company, size of company, origin country, medical specialty, implementation modality of Medical Devices, type of AI, anatomical site of use, intended user, clinical testing, focused age group and brief summary for each tool.

Data mining and statistical analysis was performed using base package in R<sup>10</sup> version 3.6.3 (R Foundation for Statistical Computing, Vienna, Austria).

## **Results**

As of latest update on October 5, 2022, FDA has listed 521 approved AI/ML-Enabled Medical Devices out of which 91 (about 17%) devices are approved by FDA in the year 2022, shown in figure 2.

Majority, 393 (about 75%) of FDA approved AI/ML-Enabled Medical Devices belong to radiology medical subspecialty followed by 392 devices (about 11%) to cardiovascular subspecialty, shown in figure 3 and 4. Furthermore, majority of AI/ML-Enabled Medical Devices are approved via 510k pathway and parent company is originated in United States. About 80% of these Medical Devices use XRAY as modality. The major anatomical site of AI/ML-Enabled Medical Devices includes Head, Breast and Chest whereas about 10% of these devices has multiple anatomical area of use. The overall trends of approval are better summarized by distribution of year to medical specialty, figure 5.

## **Discussion**

In this study we demonstrated that the number of FDA approved AI/ML-Enabled Medical Devices has continuously increased in the United States after first AI/ML-Enabled Medical Devices was approved in 1995. The significant increase in approval of such devices is observed from 2018 onwards which constitutes about 85% of all approved devices. This significant increase in approval process could be linked to broader progress of computing filed in advancement of computing devices and software, cost effective cloud storage, availability of big data and investment from big companies in building better platforms.

The highest application of AI/ML-Enabled Medical Devices is found to be in radiology specialty. As radiological imaging is asked by clinicians during routine clinical practices as well as follow-up visits, large datasets are available to be used for research purpose by scientist as well as for developing medical devices by manufacturer<sup>11</sup>. In our analysis, we found that head, chest and breast to be top 3 anatomical site of application of AI/ML-Enabled Medical Devices respectively. This could be mainly due to increase in practice of annual screening and diagnosis related to malignancy.

In this article, we have described the application of artificial intelligence and machine learning in medical devices. We have also provided insights on FDA approval pathways, summarized the current landscape of FDA approved AI/ML-Enabled Medical Devices till date. Our analysis can help understand the overview of AI/ML-Enabled Medical Devices, and its overall trends.

To our best knowledge, this is the first current comprehensive analysis of FDA listed AI/ML-Enabled Medical Devices which are recently updated in FDA webpage.

## References:

1. Artificial Intelligence (AI) Coined at Dartmouth. *Celebrate Our 250th*  
<https://250.dartmouth.edu/highlights/artificial-intelligence-ai-coined-dartmouth>  
(2018).
2. LeCun, Y., Bengio, Y. & Hinton, G. Deep learning. *Nature* **521**, 436–444 (2015).
3. Kermany, D. S. *et al.* Identifying Medical Diagnoses and Treatable Diseases by Image-Based Deep Learning. *Cell* **172**, 1122-1131.e9 (2018).
4. McDermott, M. B. A. *et al.* Reproducibility in machine learning for health research: Still a ways to go. *Science Translational Medicine* **13**, eabb1655 (2021).
5. Screening for Early Detection - CPR22. *Cancer Progress Report*  
<https://cancerprogressreport.aacr.org/progress/cpr22-contents/cpr22-screening-for-early-detection/>.
6. Health, C. for D. and R. Artificial Intelligence and Machine Learning (AI/ML)- Enabled Medical Devices. *FDA* (2022).
7. Health, C. for D. and R. The 510(k) Program - Transcript. *FDA* (2018).
8. Health, C. for D. and R. De Novo Classification Request. *FDA* (2022).
9. Health, C. for D. and R. PMA Application Methods. *FDA* (2019).
10. R: The R Project for Statistical Computing. <https://www.r-project.org/>.
11. Hosny, A., Parmar, C., Quackenbush, J., Schwartz, L. H. & Aerts, H. J. W. L. Artificial intelligence in radiology. *Nat Rev Cancer* **18**, 500–510 (2018).



**Artificial Intelligence (AI)**

ability of computer program to perform tasks that usually needs human intelligence

**Machine Learning (ML)**

learns from the data over time to make predictions

**Deep Learning (DL)**

neural networks that are modelled like neurons in human brain

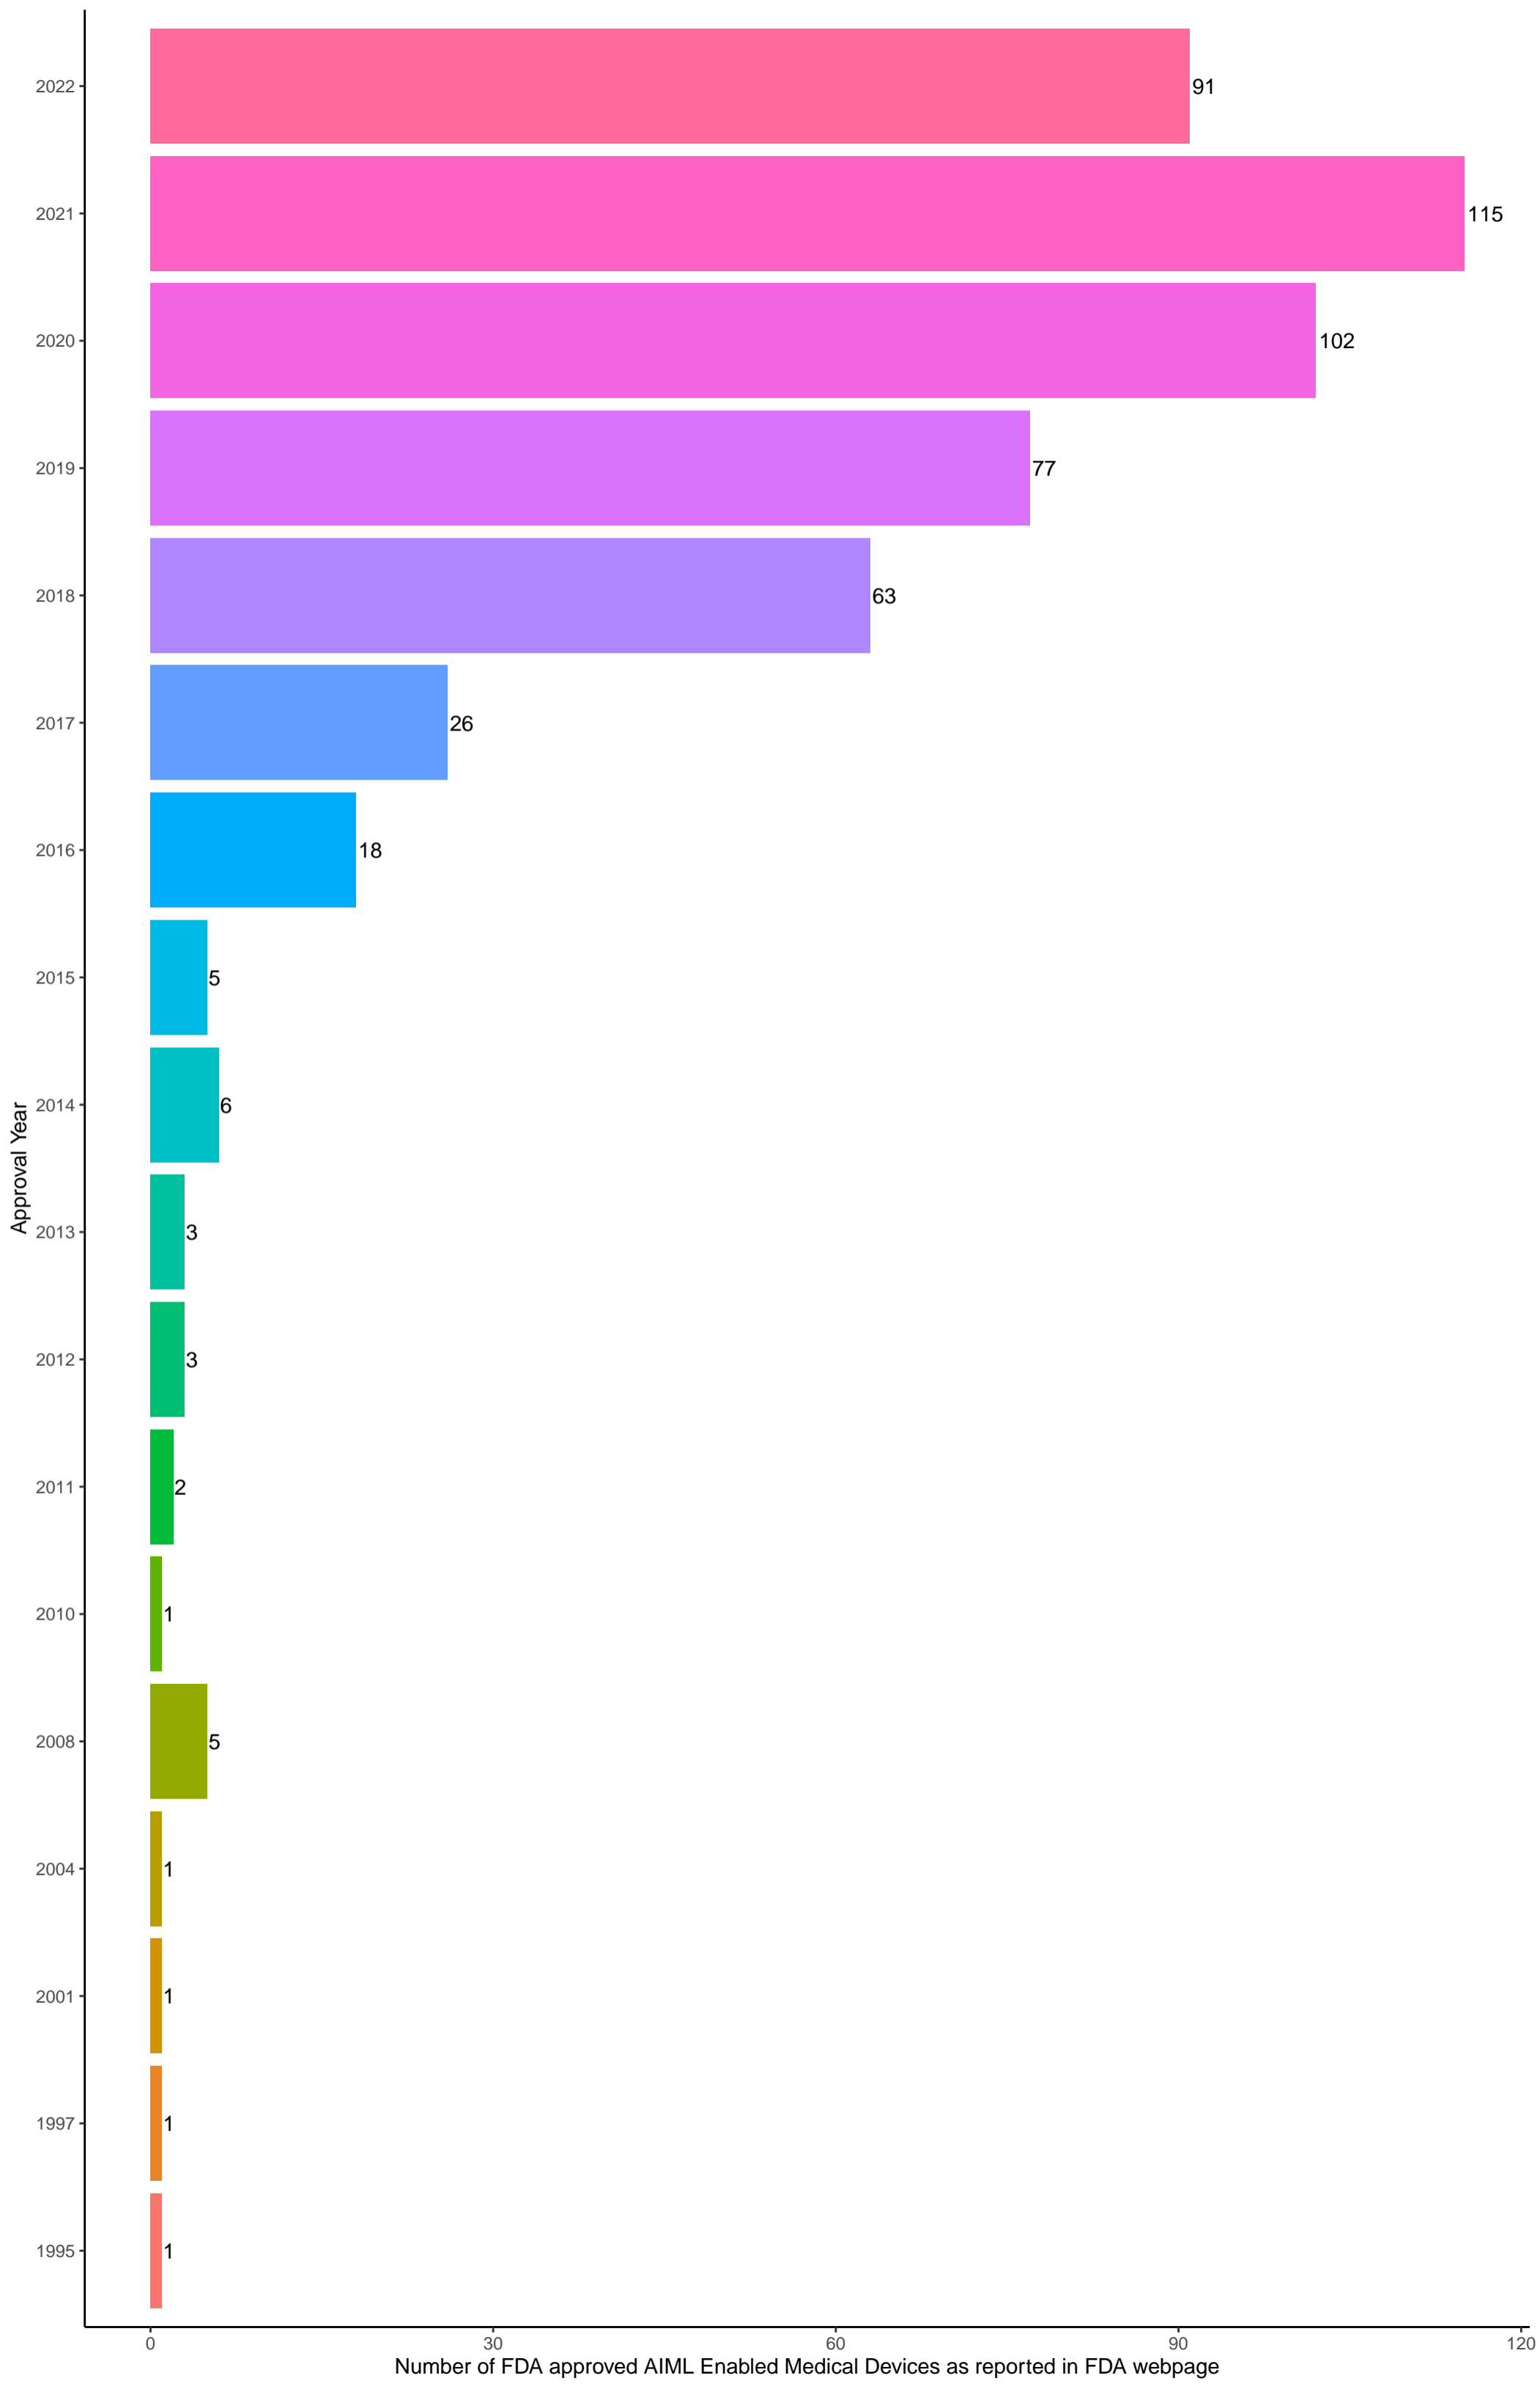

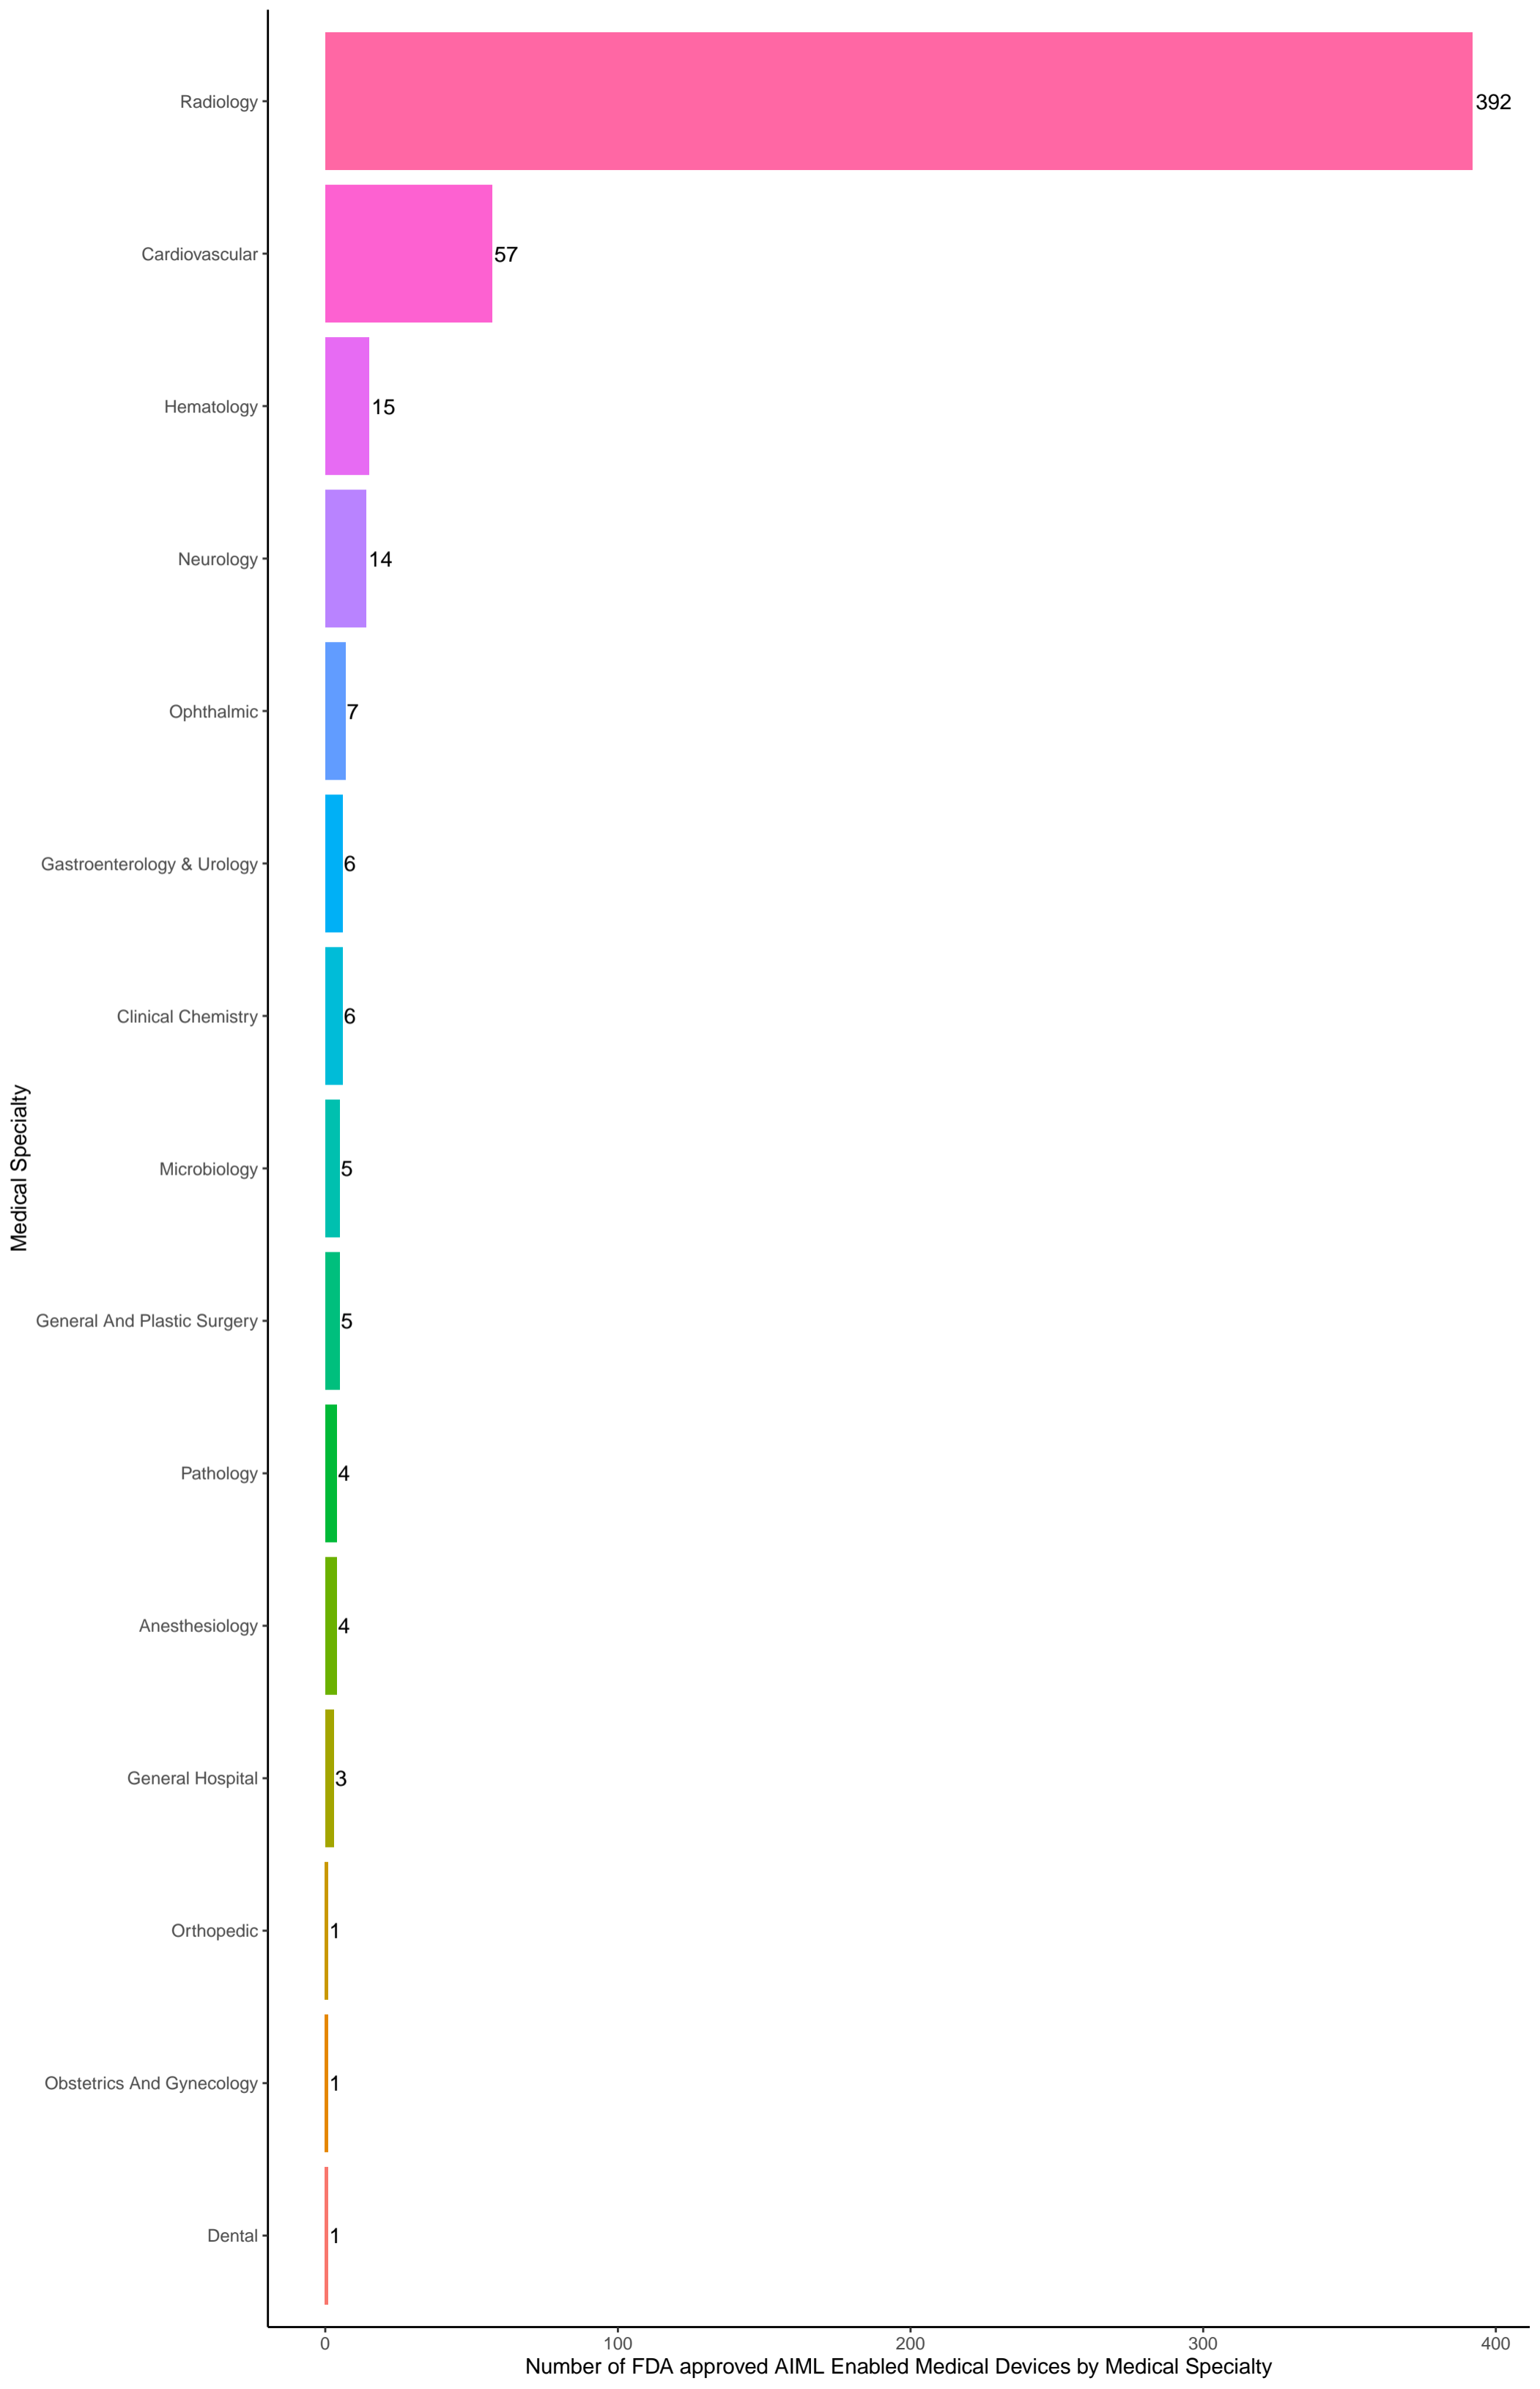





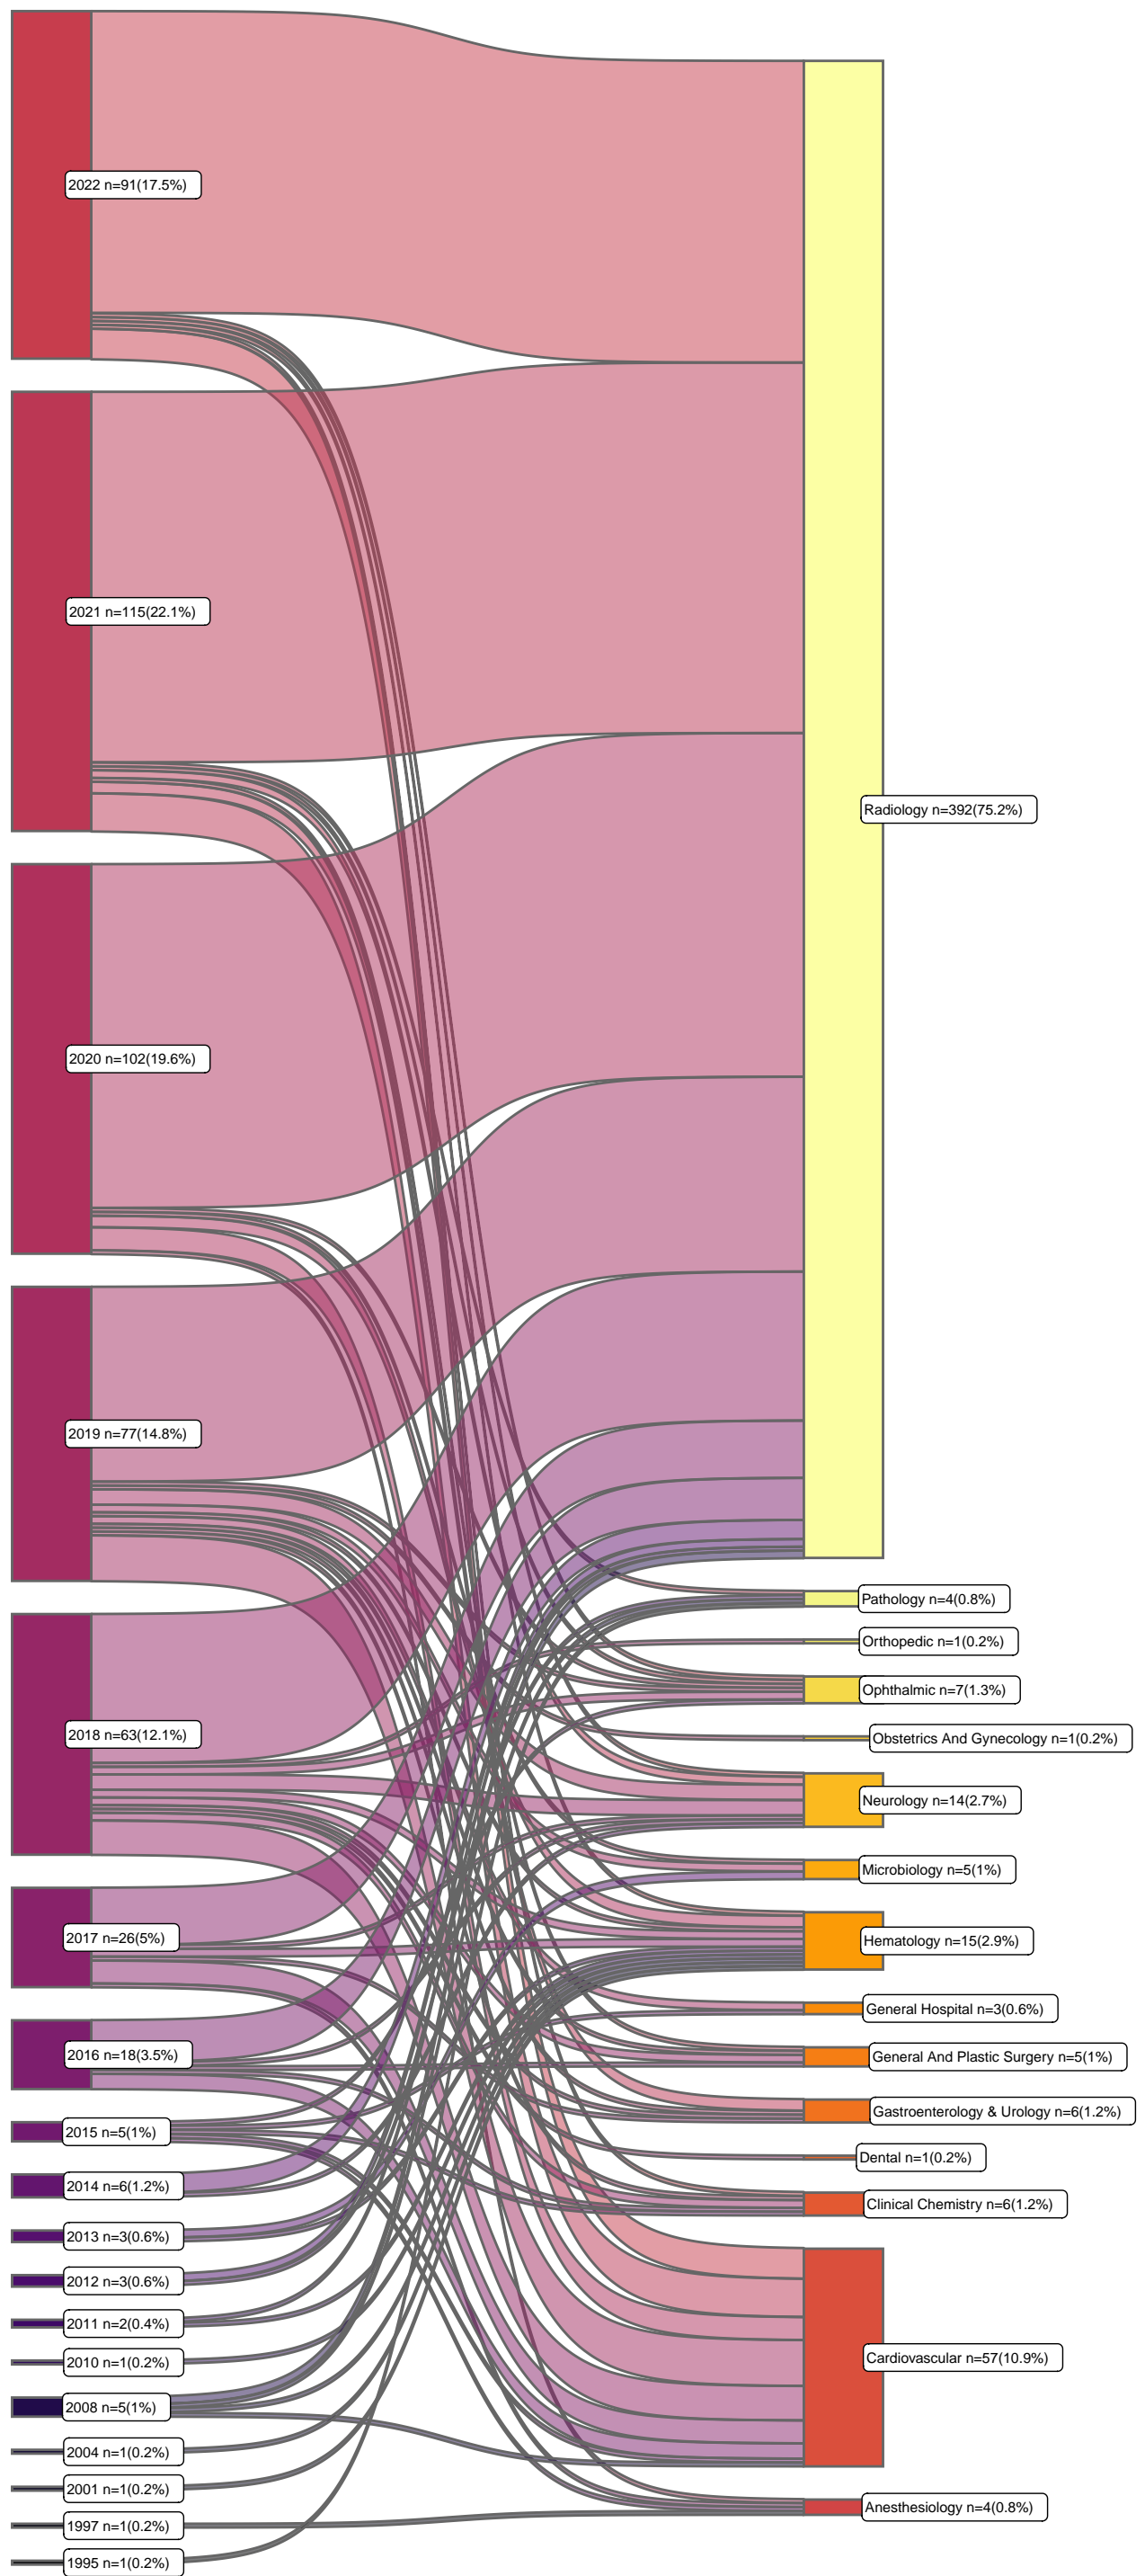

Year

Medical\_Specialty
